# Supplementary material for: Elevated plasma complement factor H related 5 protein is associated with venous thromboembolism
Source: PubMed Central journal article supplement (PMC10247781; doi:10.1038/s41467-023-38383-y), 2023-06-07
Supplement: 41467_2023_38383_MOESM3_ESM.pdf [file 41467_2023_38383_MOESM3_ESM.pdf]

## **Description of Additional Supplementary Files**

### **Supplementary Data 1**

Tab 1: Selection of antibodies with p values, FC and log P values (Citrate & EDTA)

Tab 2: Summary of the statistic values for Figure 1 c-i and 2 d-e

Tab 3: IC-MS SULF1

Tab 4: Risk factors & clinical chemistry

Tab 5: UAC

Tab 6: Liver co-expression

Tab 7: STRING

Tab 8: C3 and CFHR5

Tab 9: Meta sub-analyses

Tab 10: Sub-analysis (BMI, CRP)

Tab 11: GWAS metanalysis A

Tab 12: GWAS metanalysis B

Tab 13: GWAS metanalysis C

Tab 14: Rare variants

Tab 15: TGP analysis

### **Supplementary Data 2**

Tab 1: VEBIOS Coagulation

Tab 2: DFW-VTE

Tab 3: FARIVE

Tab 4: RETROVE

Tab 5: MARTHA

Tab 6: ALL COHORTS
